# Supplementary material for: miR34a/GOLPH3 Axis abrogates Urothelial Bladder Cancer Chemoresistance via Reduced Cancer Stemness
Source: PubMed Central journal article supplement — Theranostics. 2017 Oct 17;7(19):4777–90. doi: 10.7150/thno.21713 (PMC5706099; doi:10.7150/thno.21713), 2017-10-17
Supplement: thnov07p4777s1.pdf [file thnov07p4777s1.pdf]

## Supplementary Material

**Supplementary Table S1. Primer list for qRT-PCR and miRNA PCR array**

| qRT-PCR primer | Forward (5'- to - 3')                           | Reverse (5'- to - 3')              |
|----------------|-------------------------------------------------|------------------------------------|
| <i>CD44</i>    | AGCAACTGAGACAGCAACCA                            | AGACGTACCAGCCATTTGT<br>GT          |
| <i>Sox2</i>    | TTTGTCTGGAGACGGAGAAGC                           | TAAGTGTCCATGCGCTGGT<br>T           |
| <i>GOLPH3</i>  | CAAGGACCGCGAGGGTTAC                             | CAAGGACCGCGAGGGTTA<br>C            |
| <i>ALDH1A1</i> | GCACGCCAGACTTACCTGTC                            | CCTCCTCAGTTGCAGGATT<br>AAAG        |
| <i>KLF4</i>    | CCTCCTCAGTTGCAGGATTAAG                          | CAGGTCCAGGAGATCGTTG<br>AA          |
| <i>β-actin</i> | CAGGTCCAGGAGATCGTTGAA                           | CTCCTTAATGTCACGCACG<br>A           |
| miRNA primer   | RT-primer (5'- to - 3')                         | qPCR-primer (5'- to - 3')          |
| Uni-primer     |                                                 | CTCAAGTGTCTGGAGTCTG<br>GCAA        |
| U6             | CTCAACTGGTGTCTGGAGTCGGCAAT<br>TCAGTTGAGAACGCTTC | ACACTCCAGCTGGGACGCA<br>AATTCGTGAAG |
| miR-34a-5p     | CTCAACTGGTGTCTGGAGTCGGCAAT<br>TCAGTTGAGACAACCAG | ACACTCCAGCTGGGTGGCA<br>GTGTCTTAGCT |
| miR-142-3p     | CTCAACTGGTGTCTGGAGTCGGCAAT<br>TCAGTTGAGTCCCTGAT | ACACTCCAGCTGGGTGGAT<br>TTTTGGATCAG |
| miR-16         | CTCAACTGGTGTCTGGAGTCGGCAAT<br>TCAGTTGAGCGCCAATA | ACACTCCAGCTGGGTAGCA<br>GCACGTAAATA |
| miR-200b       | CTCAACTGGTGTCTGGAGTCGGCAAT<br>TCAGTTGAGTCCAATGC | ACACTCCAGCTGGGCATCT<br>TACTGGGCAGC |
| miR-200c       | CTCAACTGGTGTCTGGAGTCGGCAAT<br>TCAGTTGAGCCAAACAC | ACACTCCAGCTGGGCGTCT<br>TACCCAGCAGT |
| miR-27a        | CTCAACTGGTGTCTGGAGTCGGCAAT<br>TCAGTTGAGTGCTCACA | ACACTCCAGCTGGGAGGG<br>CTTAGCTGCTTG |
| miR-320c       | CTCAACTGGTGTCTGGAGTCGGCAAT<br>TCAGTTGAGACCCTCTC | ACACTCCAGCTGGGAAAAG<br>CTGGGTTGAGA |
| miR-29c        | CTCAACTGGTGTCTGGAGTCGGCAAT<br>TCAGTTGAGGAACACCA | ACACTCCAGCTGGGTGACC<br>GATTTCTCCTG |
| miR-143        | CTCAACTGGTGTCTGGAGTCGGCAAT<br>TCAGTTGAGACCAGAGA | ACACTCCAGCTGGGGGTG<br>CAGTGCTGCATC |
| miR-133b       | CTCAACTGGTGTCTGGAGTCGGCAAT<br>TCAGTTGAGTAGCTGGT | ACACTCCAGCTGGGTTTGG<br>TCCCCTTCAAC |
| miR-100        | CTCAACTGGTGTCTGGAGTCGGCAAT<br>TCAGTTGAGCACAAGTT | ACACTCCAGCTGGGAACCC<br>GTAGATCCGAA |
| miR-490-5p     | CTCAACTGGTGTCTGGAGTCGGCAAT<br>TCAGTTGAGACCCACCT | ACACTCCAGCTGGGCCATG<br>GATCTCCAGGT |
| miR-1          | CTCAACTGGTGTCTGGAGTCGGCAAT<br>TCAGTTGAGATGGGCAT | ACACTCCAGCTGGGACATA<br>CTTCTTTATAT |
| miR-125b       | CTCAACTGGTGTCTGGAGTCGGCAAT<br>TCAGTTGAGTCACAAGT | ACACTCCAGCTGGGTCCCT<br>GAGACCCTAAC |
| miR-128        | CTCAACTGGTGTCTGGAGTCGGCAAT<br>TCAGTTGAGTCTCAGAC | ACACTCCAGCTGGGCGGG<br>GCCGTAGCACTG |
| miR-203        | CTCAACTGGTGTCTGGAGTCGGCAAT<br>TCAGTTGAGAACTGTTG | ACACTCCAGCTGGGTAGCA<br>GCACAGAAATA |

|             |                                                 |                                     |
|-------------|-------------------------------------------------|-------------------------------------|
| miR-133a    | CTCAACTGGTGTCTGGAGTCGGCAAT<br>TCAGTTGAGATTTGGTT | ACACTCCAGCTGGGAGCTG<br>GTAAAATGGAA  |
| miR-99a     | CTCAACTGGTGTCTGGAGTCGGCAAT<br>TCAGTTGAGCACAAGAT | ACACTCCAGCTGGGAACCC<br>GTAGATCCGAT  |
| miR-135a    | CTCAACTGGTGTCTGGAGTCGGCAAT<br>TCAGTTGAGTCACATAG | ACACTCCAGCTGGGTATGG<br>CTTTTTATTCC  |
| miR-1182    | CTCAACTGGTGTCTGGAGTCGGCAAT<br>TCAGTTGAGGTCACATC | ACACTCCAGCTGGGGAGG<br>GTCTTGGGAGGG  |
| miR-24      | CTCAACTGGTGTCTGGAGTCGGCAAT<br>TCAGTTGAGACTGATAT | ACACTCCAGCTGGGTGCCT<br>ACTGAGCTGAT  |
| miR-138     | CTCAACTGGTGTCTGGAGTCGGCAAT<br>TCAGTTGAGCGGCCTGA | ACACTCCAGCTGGGAGCTG<br>GTGTTGTGAAT  |
| miR-30a     | CTCAACTGGTGTCTGGAGTCGGCAAT<br>TCAGTTGAGCTTCCAGT | ACACTCCAGCTGGGTGTAA<br>ACATCCTCGAC  |
| miR-144-5p  | CTCAACTGGTGTCTGGAGTCGGCAAT<br>TCAGTTGAGCTTACAGT | ACACTCCAGCTGGGGGATA<br>TCATCATATAC  |
| miR-144-3p  | CTCAACTGGTGTCTGGAGTCGGCAAT<br>TCAGTTGAGAGTACATC | ACACTCCAGCTGGGTACAG<br>TATAGATGATG  |
| miR-145     | CTCAACTGGTGTCTGGAGTCGGCAAT<br>TCAGTTGAGAGGGATTG | ACACTCCAGCTGGGGTCCA<br>GTTTTCCCAGG  |
| miR-186     | CTCAACTGGTGTCTGGAGTCGGCAAT<br>TCAGTTGAGAGCCCAA  | ACACTCCAGCTGGGCAAAG<br>AATTCTCCTTT  |
| miR-193a-3p | CTCAACTGGTGTCTGGAGTCGGCAAT<br>TCAGTTGAGACTGGGAC | ACACTCCAGCTGGGAACTG<br>GCCTACAAAGT  |
| miR-320a    | CTCAACTGGTGTCTGGAGTCGGCAAT<br>TCAGTTGAGTCGCCCTC | ACACTCCAGCTGGGAAAAG<br>CTGGGTTGAGA  |
| miR-23b     | CTCAACTGGTGTCTGGAGTCGGCAAT<br>TCAGTTGAGAAATCAGC | ACACTCCAGCTGGGTGGGT<br>TCCTGGCATGC  |
| miR-590-3p  | CTCAACTGGTGTCTGGAGTCGGCAAT<br>TCAGTTGAGACTAGCTT | ACACTCCAGCTGGGTAAATTT<br>TATGTATAAG |
| miR-129     | CTCAACTGGTGTCTGGAGTCGGCAAT<br>TCAGTTGAGGCAAGCCC | ACACTCCAGCTGGGCTTTT<br>TGCGGTCTGGG  |
| miR-214     | CTCAACTGGTGTCTGGAGTCGGCAAT<br>TCAGTTGAGGCACAGCA | ACACTCCAGCTGGGTGCCT<br>GTCTACACTTG  |
| miR-493     | CTCAACTGGTGTCTGGAGTCGGCAAT<br>TCAGTTGAGAATGAAAG | ACACTCCAGCTGGGTGTGA<br>CATGGTAGGCT  |
| miR-221     | CTCAACTGGTGTCTGGAGTCGGCAAT<br>TCAGTTGAGAAATCTAC | ACACTCCAGCTGGGACCTG<br>GCATACAATGT  |
| miR-195     | CTCAACTGGTGTCTGGAGTCGGCAAT<br>TCAGTTGAGGCCAATAT | ACACTCCAGCTGGGTAGCA<br>GCACAGAAATA  |
| miR-27b     | CTCAACTGGTGTCTGGAGTCGGCAAT<br>TCAGTTGAGGTTACCA  | ACACTCCAGCTGGGAGAGC<br>TTAGCTGATTG  |
| miR-449a    | CTCAACTGGTGTCTGGAGTCGGCAAT<br>TCAGTTGAGACCAGCTA | ACACTCCAGCTGGGTGGCA<br>GTGTATTGTTA  |
| miR-485-5p  | CTCAACTGGTGTCTGGAGTCGGCAAT<br>TCAGTTGAGGAATTCAT | ACACTCCAGCTGGGAGAG<br>GCTGGCCGTGAT  |
| miR-101     | CTCAACTGGTGTCTGGAGTCGGCAAT<br>TCAGTTGAGAGCATCAG | ACACTCCAGCTGGGCAGTT<br>ATCACAGTGCT  |
| miR-218     | CTCAACTGGTGTCTGGAGTCGGCAAT<br>TCAGTTGAGACATGGTT | ACACTCCAGCTGGGTGTG<br>CTTGATCTAAC   |
| miR-497     | CTCAACTGGTGTCTGGAGTCGGCAAT<br>TCAGTTGAGACAAACCA | ACACTCCAGCTGGGCAGCA<br>GCACACTGTGG  |
| miR-574-3p  | CTCAACTGGTGTCTGGAGTCGGCAAT<br>TCAGTTGAGTGTGGGTG | ACACTCCAGCTGGGCACGC<br>TCATGCACACA  |
| miR-576-3p  | CTCAACTGGTGTCTGGAGTCGGCAAT<br>TCAGTTGAGGATTCCAA | ACACTCCAGCTGGGAAGAT<br>GTGGAAAATT   |

|            |                                                   |                                      |
|------------|---------------------------------------------------|--------------------------------------|
| miR-10b    | CTCAACTGGTGTCGTGGAGTCGGCAAT<br>TCAGTTGAGCACAAATT  | ACACTCCAGCTGGGTACCC<br>TGTAGAACCGA   |
| miR-182-5p | CTCAACTGGTGTCGTGGAGTCGGCAAT<br>TCAGTTGAGAGTGTGAG  | ACACTCCAGCTGGGTTTGG<br>CAATGGTAGAACT |
| miR-9      | CTCAACTGGTGTCGTGGAGTCGGCAAT<br>TCAGTTGAGTCATACAG  | ACACTCCAGCTGGGTCTTT<br>GGTTATCTAGCT  |
| miR-708    | CTCAACTGGTGTCGTGGAGTCGGCAAT<br>TCAGTTGAGCCCAGCTA  | ACACTCCAGCTGGGAAGGA<br>GCTTACAATCT   |
| miR-19a    | CTCAACTGGTGTCGTGGAGTCGGCAAT<br>TCAGTTGAGTGTAGTGC  | ACACTCCAGCTGGGAGTTT<br>TGCATAGTTGC   |
| miR-96     | CTCAACTGGTGTCGTGGAGTCGGCAAT<br>TCAGTTGAGAGCAAAAA  | ACACTCCAGCTGGGTTTGG<br>CACTAGCACAT   |
| miR-150    | CTCAACTGGTGTCGTGGAGTCGGCAAT<br>TCAGTTGAGCACTGGTA  | ACACTCCAGCTGGGTCTCC<br>CAACCCTTGTA   |
| miR-155    | CTCAACTGGTGTCGTGGAGTCGGCAAT<br>TCAGTTGAGACCCCTATC | ACACTCCAGCTGGGTAAAT<br>GCTAATCGTGA   |

## Supplementary Figure S1 Relative quantification of protein expression levels in western blot assay

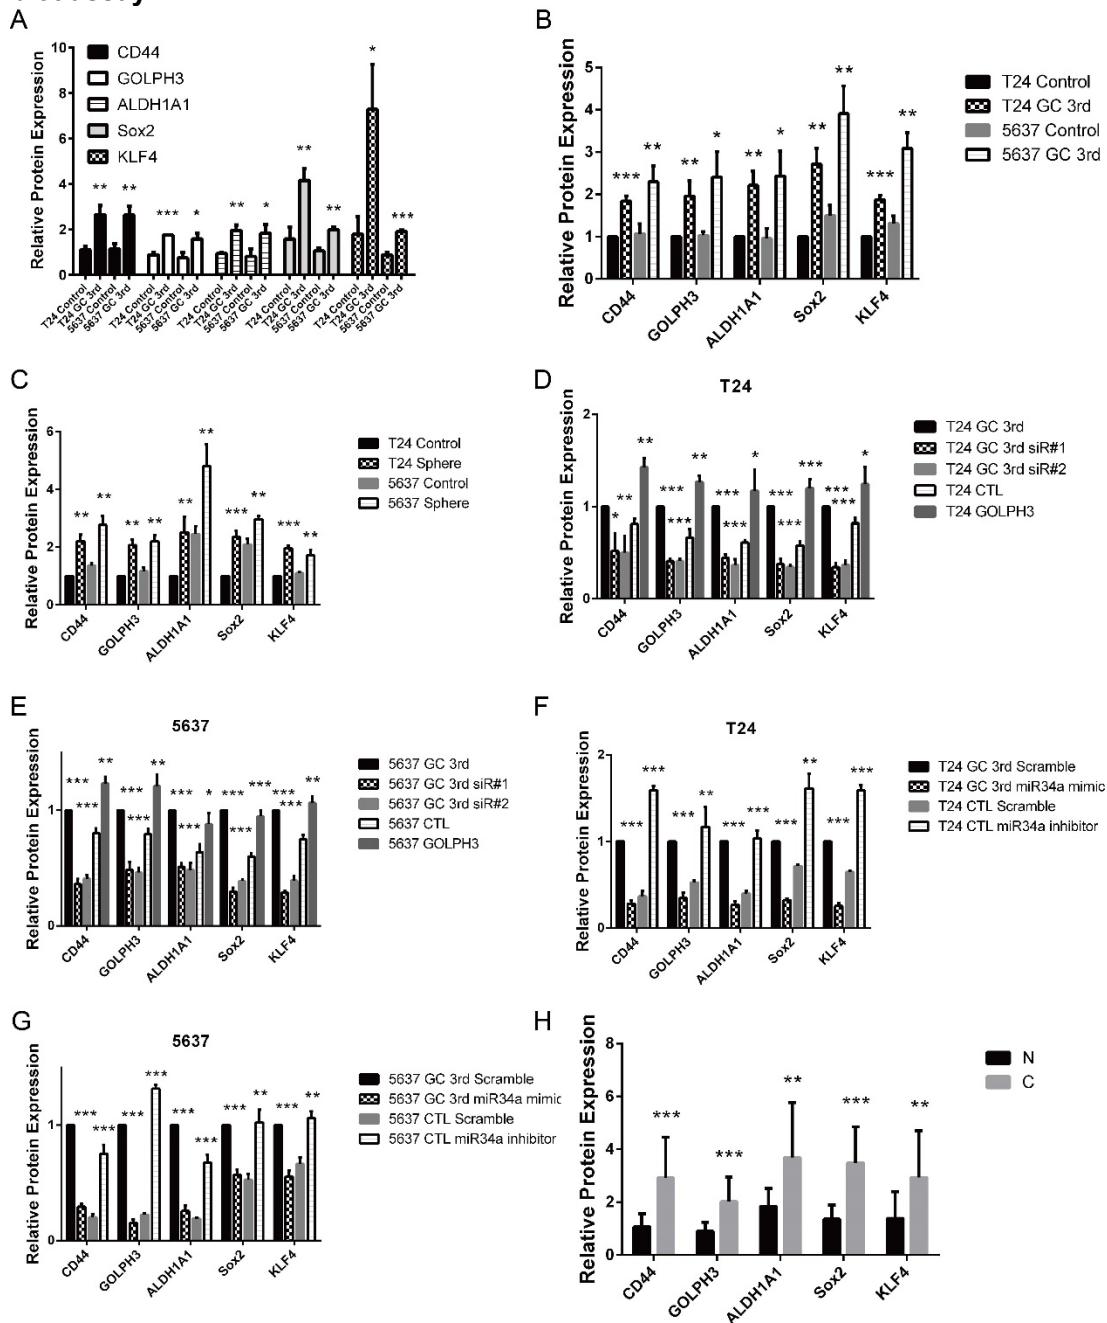

### Supplementary Figure S1 legends:

(A) quantification of protein expression levels in Fig 1B, (B) quantification of protein expression levels in Fig 2D, (C) quantification of protein expression levels in Fig 3A, (D) quantification of protein expression levels in Fig 3E left, (E) quantification of protein expression levels in Fig 3E right, (F) quantification of protein expression levels in Fig 4I left, (G) quantification of protein expression levels in Fig 4I right, (H) quantification of protein expression levels in Fig 6C (\*  $P < 0.05$ , \*\*  $P < 0.01$ , \*\*\*  $P < 0.001$ .) The experiment was done in triplicate.
